# Supplementary material for: Specific Intracellular Signature of SARS-CoV-2 Infection Using Confocal Raman Microscopy
Source: Research Square preprint supplement (doi:10.21203/rs.3.rs-1439575/v1), 2022-03-25
Supplement: Supplementary file 1 [file 53ee339953d568126e56c8c0.docx]

**Supplementary data**

**Table SI: Significant Raman peaks observed in the PC loadings contributing to the separation of SARS-CoV-2 or MeV-infected and non-infected cells.**

| ***Raman peaks in cm-1** | | |
| --- | --- | --- |
| **Cytoplasm region** | **Golgi-mitochondria** | **Nucleus** |
| 465: glycogen | 790: phosphodiester bands in DNA O-P-O stretching DNA | 1006 : Phenylalanine |
| 782 : DNA, Thymine, cytosine, uracil, RNA, U, T, C (ring breathing modes in the DNA/RNA bases) | 1099: n(C-N) | 1240: RNA |
| 1001: Phenylalanine | 1253: A, T (ring breathing modes of the DNA/RNA bases ,lipid | 1304 : adenine, cytosine |
| 1442: Cholesterol, fatty acid band d(CH2) (lipids) | 1294: CH2 deformation (lipid) | 1457 :Deoxyribose d(CH2) |
| 1457: Deoxyribose d(CH2) | 1304: CH2 deformation lipid , | 1572: Ring breathing modes in the DNA bases G, A (ring breathing modes of the DNA/RNA bases) |
| 1651 Lipid (C=C stretch) | 1457 :Deoxyribose d(CH2) | 1651: (C=C) Amide I Protein |
| 2885: v3 CH3, lipids, fatty acids | 1584: C=C bending mode of phenylalanine | 2872 :CH2 asymmetric stretch and CH stretch of lipids and proteins |
| 2929: CH2 asymmetric stretch | 1646: Amide I | 2881 :CH2 asymmetric stretch of proteins |
|  | 1656: Amide I | 2927 :Symmetric CH3 stretch Due primarily to protein |
|  | 2849 :CH2  asymmetric stretch of lipids and proteins | 2941: C-H vibrations in proteins |
|  | 2862: CH2 symmetric stretch of lipids |  |
|  | 2906: C-H stretch of lipids and proteins |  |
|  | 2949: lipids, fatty acids |  |

***** Classification of the infection signature (either SARS-CoV-2 or MeV) compared to non-infected cells.


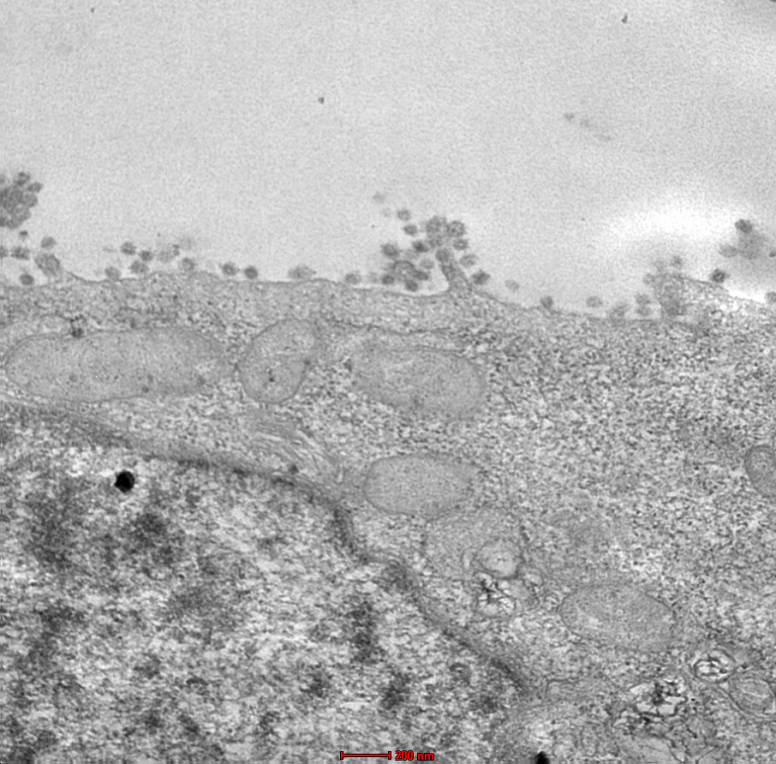

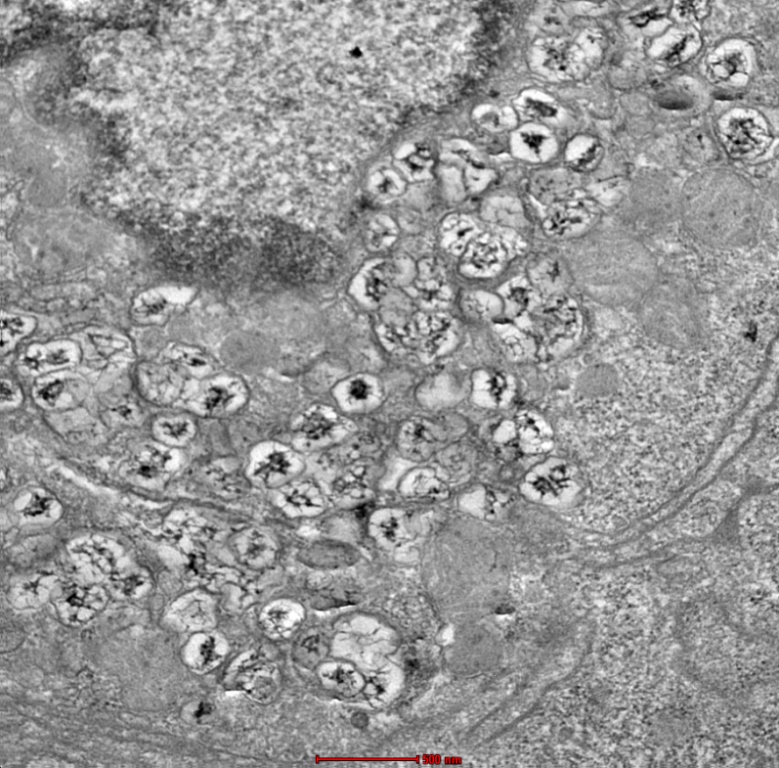


**A**

**B**

**Figure S1**: Transmission electron microscopy images of thin sections of SARS-CoV-2 infected Vero E6 cells producing SARS-CoV-2 showing (A) SARS-CoV-2 particles at the cell surface and (B) multiple intracellular replicative virus-filled organelles inside the cell cytoplasm that are absent in non-infected cells. Scale bars are 200-500 nm as indicated.


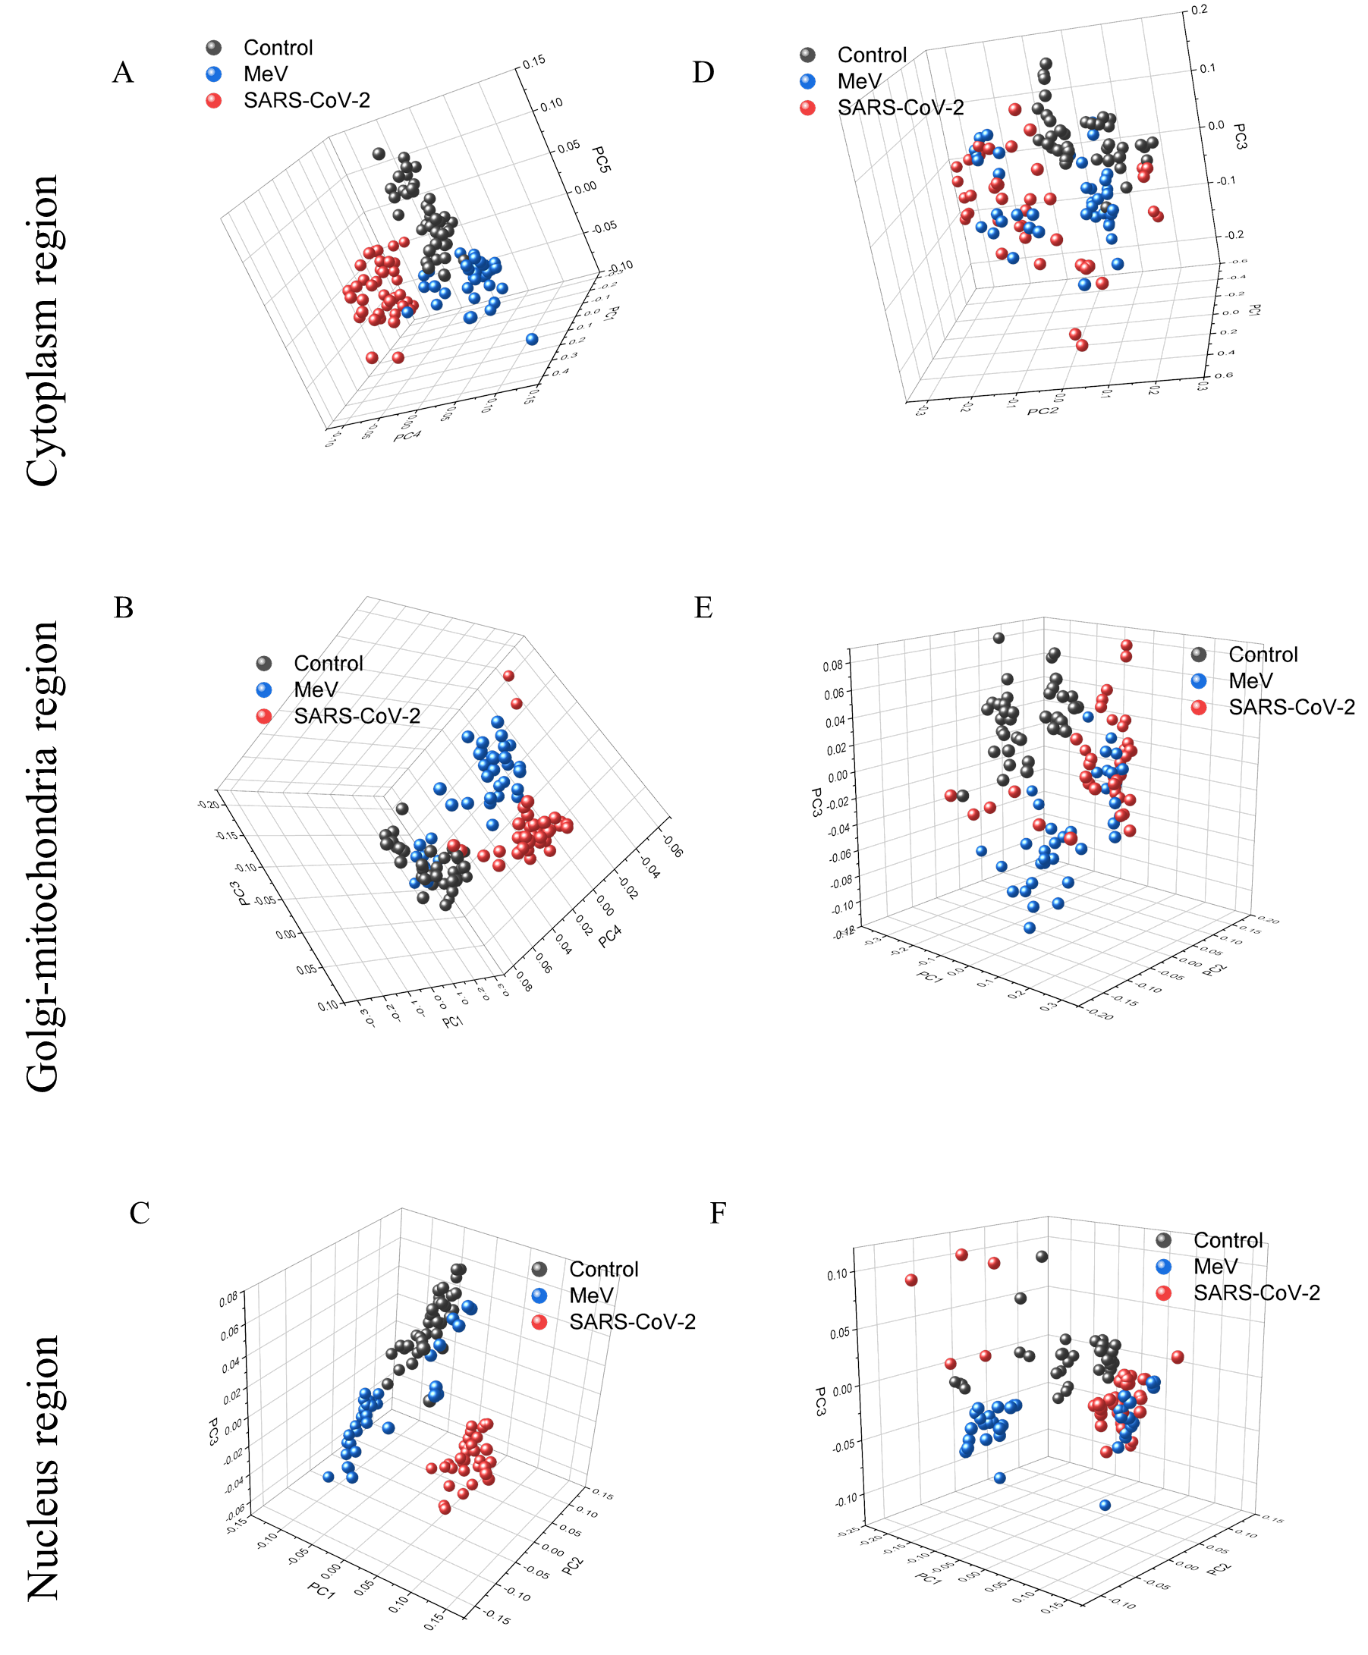


**Figure S2:** The score plot obtained using Principal component analysis for experimental batch 2 (A to C) and experimental batch 3 (D to F).

**
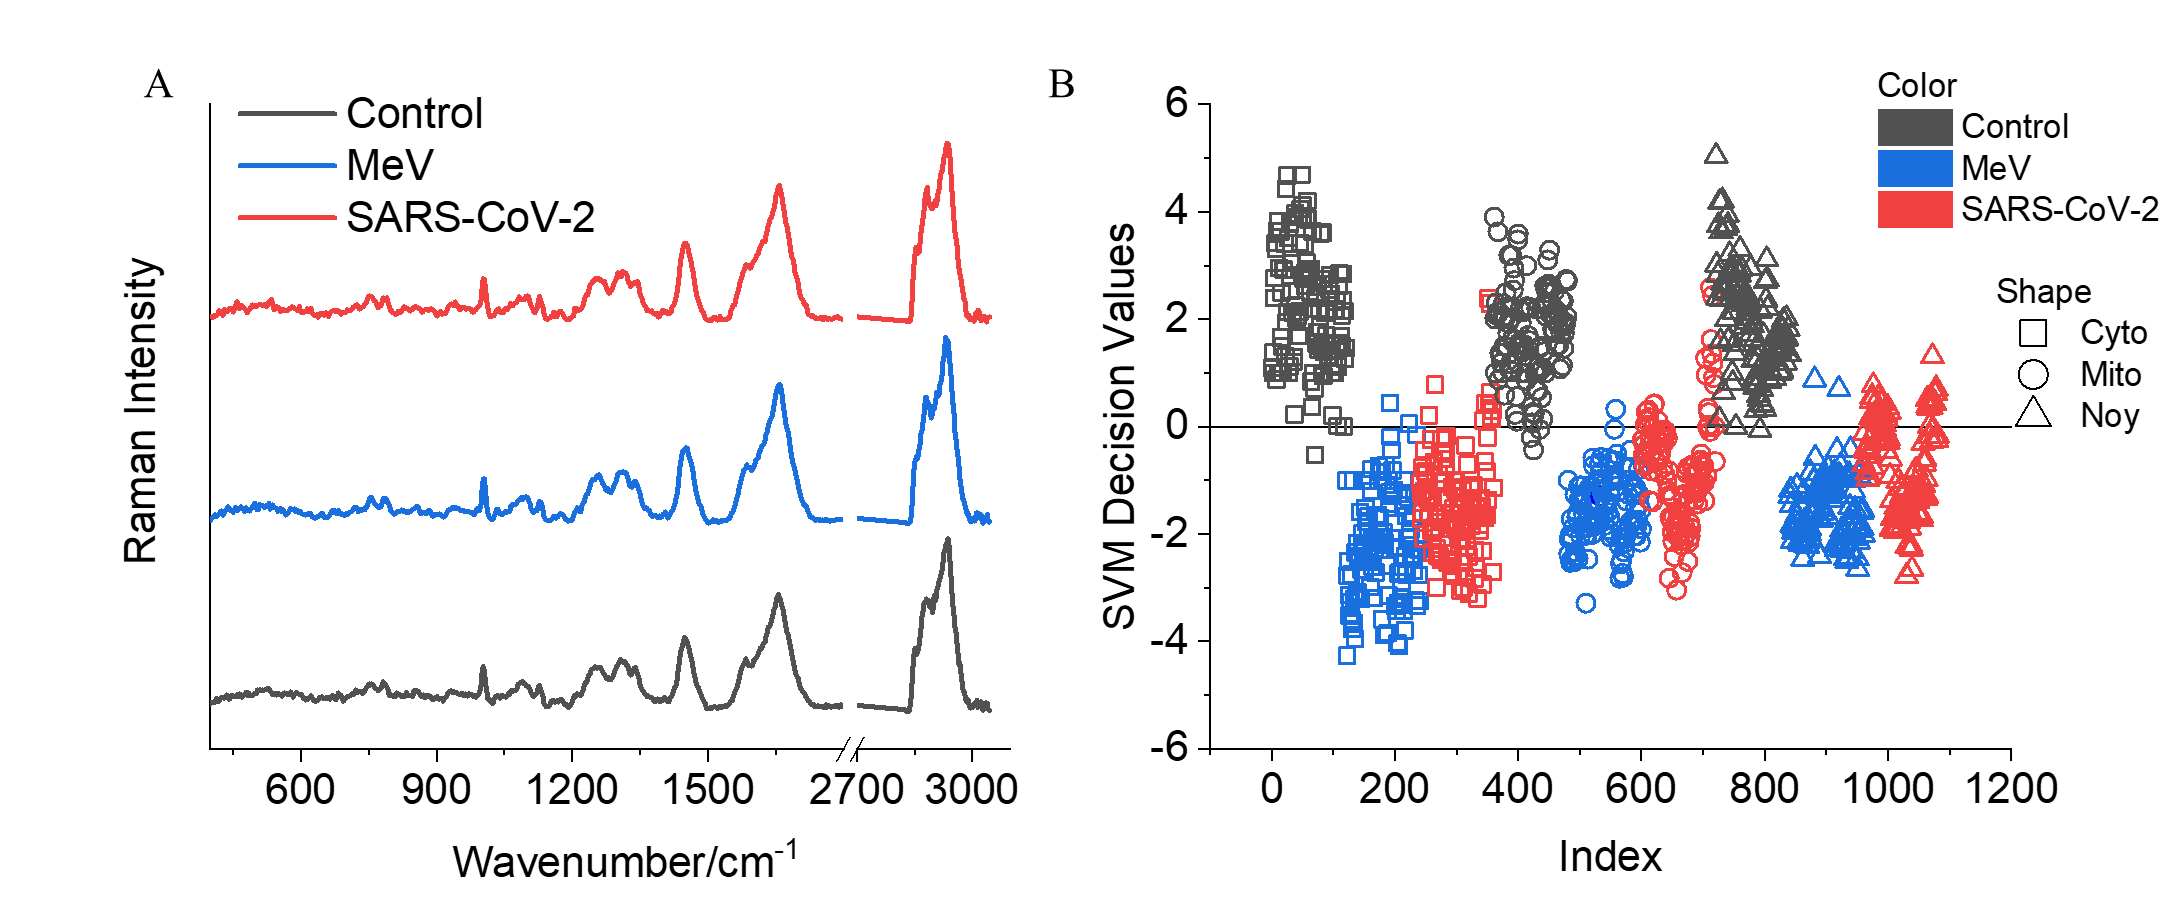
**

**Figure S3**: Raman model generated using support vector machine (SVM) algorithm to differentiate non-infected (Control, black) from SARS-CoV-2 (red) and measles virus (MeV, blue) infected Vero E6 cells. The model was generated using Raman spectra extracted from intracellular components: cytoplasm (Cyto, square), Golgi-mitochondria bodies (Mito, circle), and nucleus (Noy, triangle) of the Vero E6 cells. (Total classification accuracy 95%, 10-fold cross-validation)
